# Supplementary material
Source: Springer Nature journal article supplement (https://www.springermedizin.de/resource/supplementary/12936_2009_1039_MOESM9_ESM.pdf/9548836)

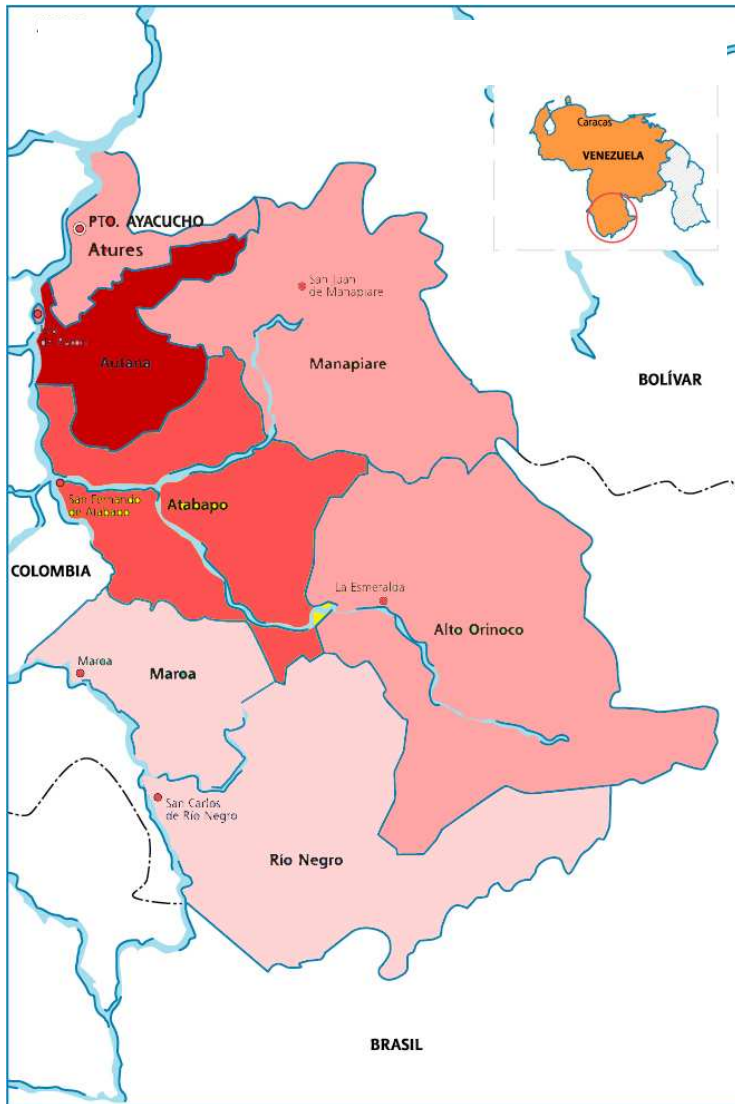

API:

0 – 50

51 – 100

101 - 150

151 - 200

201 - 250

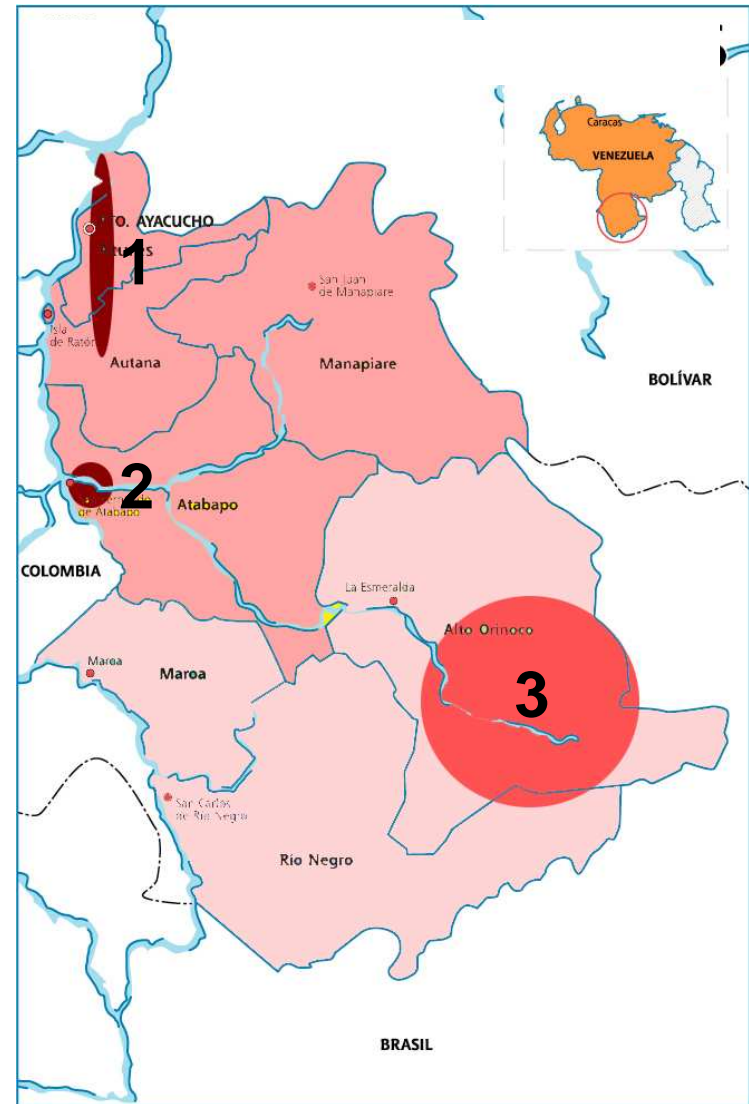

Supplement: MOESM9 [file 9548836]
